# Supplementary material
Source: PubMed Central journal article supplement (PMC1383544)
Supplement: 7600964s3.pdf [file 7600964s3.pdf]

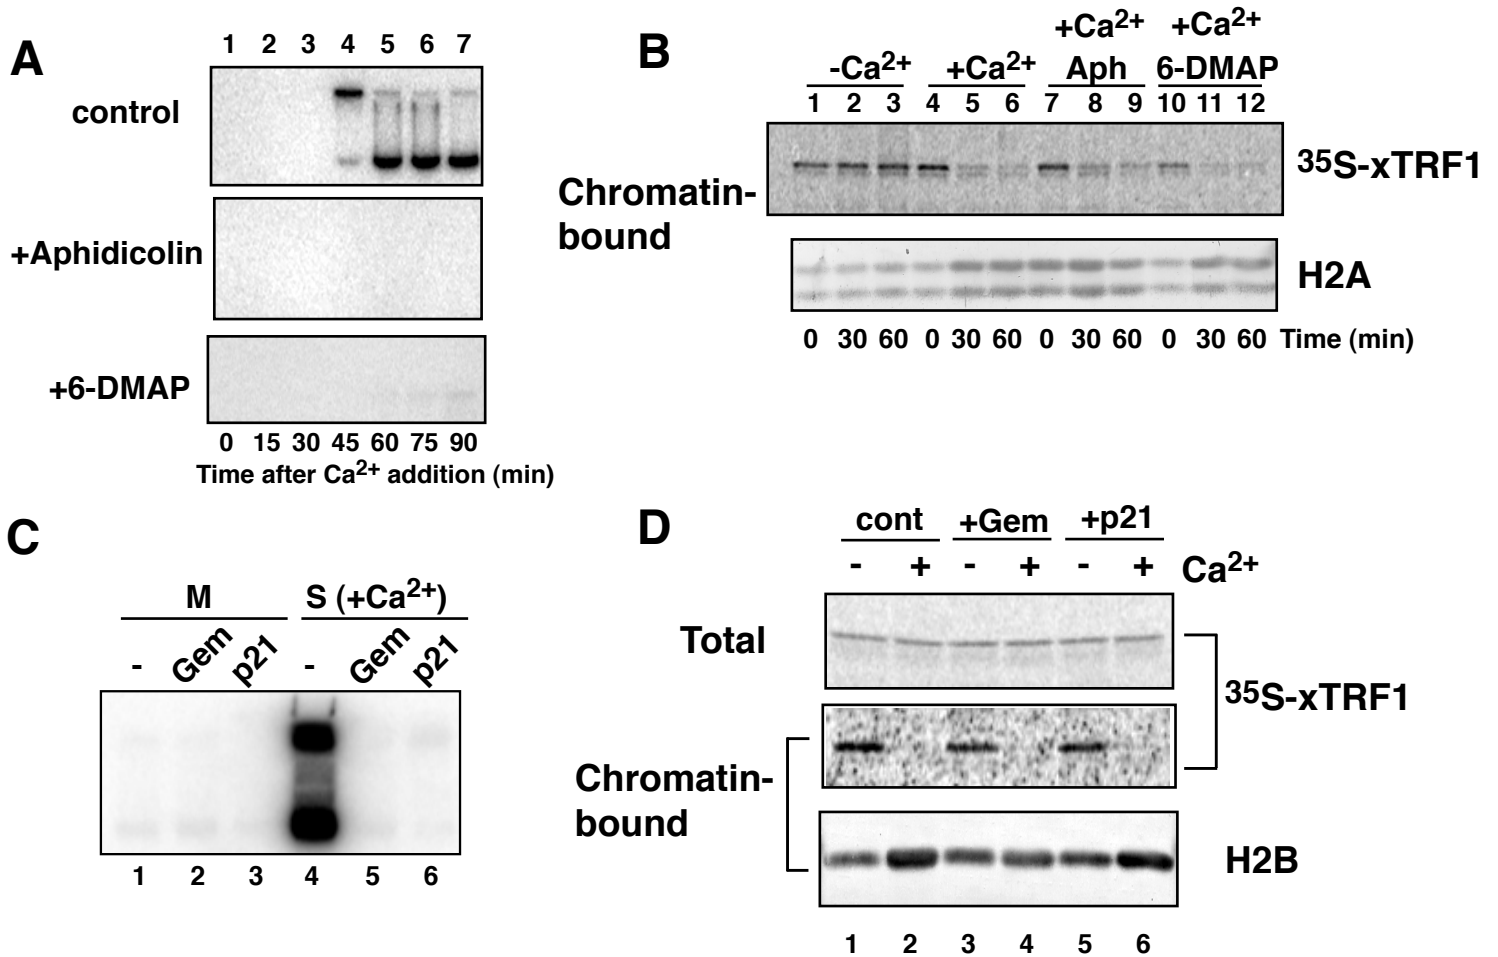

Nishiyama *et al.* Supplementary Figure 3

### Supplementary Figure 3

xTRF1 dissociates from chromatin independently of DNA replication

**(A)** DNA replication in egg extracts was inhibited by aphidicolin or 6-DMAP. Sperm chromatin was added to CSF extracts in the absence (top panel) or presence of aphidicolin (20  $\mu\text{g/ml}$ , middle panel) or 6-dimethylaminopurine (6-DMAP; 2.5 mM, bottom panel) and incubation was carried out at 22°C for 10 min. After the incubation,  $\text{Ca}^{2+}$  was added to make a final concentration of 0.6 mM at time 0. Aliquots were removed at the indicated time points and DNA replication in the extracts was analyzed by measuring the incorporation of [ $\alpha$ - $^{32}\text{P}$ ]dATP into sperm DNA. Replication products were subjected to agarose gel electrophoresis, followed by autoradiography.

**(B)** Aphidicolin or 6-DMAP treatment does not affect the kinetics of xTRF1 dissociation from chromatin in interphase egg extracts. Sperm chromatin was incubated for 10 min with  $^{35}\text{S}$ -labeled xTRF1 and CSF extracts with or without 20  $\mu\text{g/ml}$  aphidicolin (Aph) or 2.5 mM 6-DMAP as indicated.  $\text{Ca}^{2+}$  was added to the extracts to make a final concentration of 0.6 mM at time 0, and chromatin-bound xTRF1 (top panel) and histone H2A (as loading control, bottom panel) were analyzed at the indicated time points (lanes 4-12). As control, chromatin incubated in the absence of  $\text{Ca}^{2+}$  was also analyzed (lanes 1-3). Note that the amount of xTRF1 bound to chromatin in the 6-DMAP-treated CSF extracts prior to  $\text{Ca}^{2+}$  addition (lane 10) is smaller than those in mock-treated or aphidicolin-treated CSF extracts (lanes 1, 4 and 7).

**(C)** Recombinant xGeminin or human p21 inhibits DNA replication of chromatin in interphase egg extracts. CSF extracts were incubated with purified GST-p21 (50  $\mu\text{g/ml}$ , p21) or GST-xGeminin (15  $\mu\text{g/ml}$ , Gem) at 22°C for 1 hr in the absence (lanes 1-3) or presence (lanes 4-6) of 0.6 mM  $\text{Ca}^{2+}$ . DNA replication in the extracts was analyzed as described in (A).

**(D)** xTRF1 dissociates from interphase chromatin in egg extracts treated with xGeminin or human p21. Sperm chromatin was incubated in xGeminin- or human p21-treated CSF extracts containing  $^{35}\text{S}$ -labeled xTRF1 with (lanes 2, 4, and 6) or without (lanes 1, 3, and 5)  $\text{Ca}^{2+}$ . After 1 hr incubation, total extracts (top panel) or chromatin-bound proteins (middle and bottom panels) were analyzed for labeled xTRF1 and histone H2B (as loading control), as indicated.
