# Supplementary material
Source: PubMed Central journal article supplement (PMC1383544)
Supplement: 7600964s5.pdf [file 7600964s5.pdf]

## Supplementary Materials and methods

### *Cloning of Xenopus TRF1 and TRF2*

BLAST search for potential *Xenopus* TRF1 and TRF2 sequences in the EST database led to the identification of candidate clones (accession nos. BG552350 and BJ638816). With specific oligonucleotides (for TRF1, 5'-gccttcagaggtcacaatcactgtcaac-3' and for TRF2, 5'-ggaccatgaagaaactggggatcgtgcc-3') deduced from these clones, the 5' end of cDNA was determined using a SMART RACE cDNA amplification kit (Clontech) and total *Xenopus* oocyte RNA. Then, the full-length cDNAs were isolated by PCR using an Expand High Fidelity PCR system (Roche Biochemicals) with two oligonucleotides (for TRF1, sense, 5'-GTAACAGAGAGCCAGTTCAAACC-3', and antisense, 5'-cactctcatagaaaagtaattgcc-3'; for TRF2, sense, 5'-GCATAAGGACTTCCAGGAGATCCGGGAC-3', and antisense 5'-ccttcggtgtagagtacaaggcctc-3'). Three independent clones were isolated and fully sequenced. When nucleotide changes were found, we tentatively assigned the nucleotide that was found in two out of three clones as a correct nucleotide. The thus-obtained full-length *Xenopus* TRF1 cDNA (accession no. AF525882) contains 1,413 bp with an open reading frame encoding 420 amino acids and *Xenopus* TRF2 cDNA (accession no. DQ118429) contains 1,717 bp with an open reading frame encoding 468 amino acids.

### *In vitro transcription/translation and electrophoretic mobility shift assay*

*In vitro* transcription/translation of xTRF1 were performed using a TnT-T7 coupled reticulocyte lysate system (Promega). Plasmid DNA (0.5 µg per 20 µl reaction) was used in the presence or absence of <sup>35</sup>S-methionine. Unlabeled products were diluted 1:1 with buffer D (100 mM KCl, 3 mM MgCl<sub>2</sub>, 20% glycerol, 0.1% NP-40, 1 mM DTT, 1x Complete (Roche Biochemicals) and 20 mM HEPES-KOH [pH 7.6]), and the resulting aliquot of 2 µl was used for electrophoretic mobility shift assay (EMSA). EMSA was performed as described (Bianchi et al., 1997) using the <sup>32</sup>P-labeled insert fragment of pTH5 that contained 27 tandem repeats of TTAGGG (de Lange et al., 1990). Binding reactions (in 5% glycerol, 4% Ficoll, 20 mM HEPES-KOH [pH 7.9], 150 mM KCl, 1

mM MgCl<sub>2</sub>, 0.1 mM EDTA and 0.5 mM dithiothreitol (DTT)) were carried out at RT for 30 min and run on a 5% polyacrylamide gel (29:1) in 1 × TBE at RT at 13 V/cm for 1 hr. Dried gels were analyzed by autoradiography or a phosphorimager.

### ***Chromatin assembly***

To prepare the chromatin fractions, sperm chromatin (4000 sperm heads/μl extract) was incubated with the extracts supplemented with <sup>35</sup>S-labeled xTRF1 for appropriate times at 22°C or RT. Aliquots were diluted with 10-fold volume of ice-cold extraction buffer (EB) (100 mM KCl, 5 mM MgCl<sub>2</sub> and 20 mM HEPES-KOH [pH 7.5]) containing 0.2% Triton X-100 and placed on ice for 10 min. Then, the chromatin was isolated by centrifugation through a 30% sucrose cushion in EB at 10,000 rpm for 15 min. The isolated chromatin was analyzed by SDS-PAGE and autoradiography or immunoblotting.

### ***Solid-phase chromatin assembly***

The pT2AG3 plasmid containing ~800-bp telomeric repeats was digested with *Bsr*F I and *Bbs* I and the *Bsr*F I site was labeled by Klenow enzyme with biotin-14-dCTP. The *Bsr*F I-*Bbs* I fragment was purified by 1% agarose electrophoresis using a Gel Extraction kit (Qiagen), and the labeled DNA fragment was conjugated to streptavidin-coated paramagnetic beads (Streptavidin MagneSphere Paramagnetic Particles, Promega) following the manufacturer's instructions. As control, pBluescript KS(-) was similarly conjugated to the beads. One μg of DNA conjugated to 50 μg of beads was incubated with 50 μl of egg extracts at 22°C for 1 hr on a rotating wheel to prepare the reconstituted chromatin. Chromatin-bound proteins were analyzed by SDS-PAGE and phosphorimaging after the beads were separated from the extract and washed with β-GPEB (80 mM β-glycerophosphate, 20 mM EGTA, 5 mM MgCl<sub>2</sub> and 20 mM HEPES-KOH [pH 7.5]) containing 0.2% NP-40. For the samples treated with lambda phosphatase, beads were suspended in 50 μl of 1 x lambda phosphatase buffer, 2 mM MnCl<sub>2</sub> and 400 U of lambda phosphatase (New England Biolabs) in the presence or absence of 50 mM NaF, 10 mM orthosodium vanadate and 1 μM okadaic acid, and then incubated at 30°C for 2 hr.

### ***DNA replication assay***

DNA replication activity was measured as the incorporation of [ $\alpha$ - $^{32}$ P]dATP into sperm DNA according to a previously described method (Fang and Newport, 1991). Briefly, 10  $\mu$ Ci of [ $\alpha$ - $^{32}$ P]dATP was added to 50  $\mu$ l of egg extract containing 500 demembrated sperm nuclei per  $\mu$ l. Aliquots were taken at various time points, and reactions were quenched by adding an equal volume of 2% SDS, 10 mM EDTA and 10 mM Tris (pH 7.0). Samples were then digested with proteinase K (20  $\mu$ g/ml) at 37°C for 1 hr and subjected to electrophoresis on a 0.8% agarose gel. The gels were dried and exposed to X-ray film for direct autoradiography.

### **References**

- Bianchi, A, Smith, S, Chong, L, Elias, P and de Lange, T (1997) TRF1 is a dimer and bends telomeric DNA. *EMBO J* **16**: 1785-1794
- de Lange, T, Shiue, L, Myers, RM, Cox, DR., Naylor, SL, Killery, AM and Varmus, HE (1990) Structure and variability of human chromosome ends. *Mol Cell Biol* **10**: 518-527
- Fang, F and Newport, JW (1991) Evidence that the G1-S and G2-M transitions are controlled by different cdc2 proteins in higher eukaryotes. *Cell* **66**: 731-742
